# Supplementary material
Source: PubMed Central journal article supplement (PMC4886783)
Supplement: JVI.00075-16_zjv999181701so1.pdf [file JVI.00075-16_zjv999181701so1.pdf]

|             | Treatment / Conditions                                                   | PFU/mL                             | TEM image                                                                             |
|-------------|--------------------------------------------------------------------------|------------------------------------|---------------------------------------------------------------------------------------|
| Control     | 10 $\mu$ l virus<br>+ 90 $\mu$ l Tris AC buffer<br>Room temp. for 90 min | $3 \times 10^{10}$<br>$\sim 100\%$ | 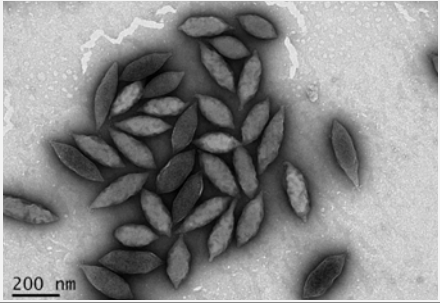   |
| Bioling     | 10 $\mu$ l virus<br>+ 90 $\mu$ l Tris AC buffer<br>100 °C for 40 min     | $2 \times 10^4$<br>$< 1$           |   |
| Autoclaving | 10 $\mu$ l virus<br>+ 90 $\mu$ l Tris AC buffer<br>115 °C for 20 min     | $5 \times 10^4$<br>$< 1\%$         |  |
| Freezing    | 10 $\mu$ l virus<br>+ 90 $\mu$ l Tris AC buffer<br>-20°C for 24 h        | $3 \times 10^{10}$<br>$\sim 100\%$ |  |

|                | Treatment / Conditions                                                                  | PFU/mL<br><i>% of control</i> | EM picture                                                                            |
|----------------|-----------------------------------------------------------------------------------------|-------------------------------|---------------------------------------------------------------------------------------|
| Control        | 10 $\mu$ l virus<br>+ 90 $\mu$ l Tris AC buffer<br>Room temp. for 90 min                | $7 \times 10^7$<br>100 %      | 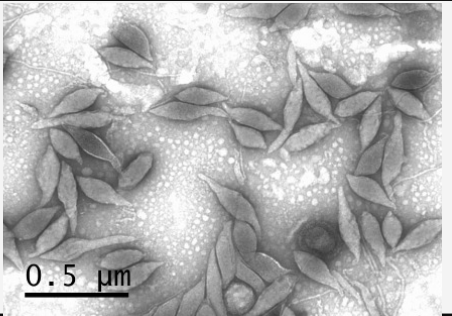   |
| Proteinase K   | 10 $\mu$ l virus<br>+ 90 $\mu$ l Proteinase K 2 mg/mL<br>78°C for 90 min                | 0<br>~ 0 %                    |   |
| UV irradiation | 10 $\mu$ l virus<br>+ 90 $\mu$ l Tris AC buffer<br>UV irradiation 1 J/cm <sup>2</sup>   | 0<br>~ 0 %                    |  |
|                | 10 $\mu$ l virus<br>+ 90 $\mu$ l Tris AC buffer<br>UV irradiation 40 mJ/cm <sup>2</sup> | $2 \times 10^6$<br>~ 2 %      |  |

|              | Treatment / Conditions                                                        | PFU/mL<br><i>% of control</i> | EM picture                                                                           |
|--------------|-------------------------------------------------------------------------------|-------------------------------|--------------------------------------------------------------------------------------|
| Triton X-100 | 10 $\mu$ l virus<br>+ 90 $\mu$ l Triton X-100 0.1 %<br>Room temp. for 90 min  | $3 \times 10^7$<br>~ 42 %     | 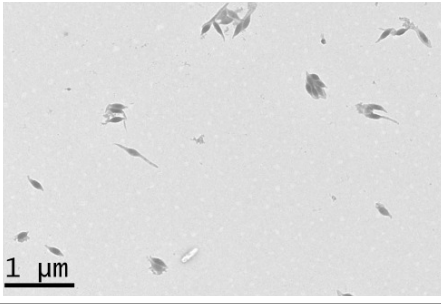  |
|              | 10 $\mu$ l virus<br>+ 90 $\mu$ l Triton X-100 0.01 %<br>Room temp. for 90 min | $3 \times 10^7$<br>~ 44 %     |  |

**Table S1** Summary of the SMV1 stability experiments. Highly purified SMV1 virions were treated with different solvents and detergents, as well as UV conditions. After each treatment, viral infectivity (PFU/mL) was determined by plaque assays and the percentage of still infectious virions was calculated as percentage of the original control (*italic*). The appearance of the virions was assayed by negative-stain transmission electron microscopy (right panel). Note: the second control shows SMV1 virions with tails, this virus preparation was obtained by 48 h incubation to ensure high virus yield, ample time for tail development.
